# Supplementary material
Source: PubMed Central journal article supplement (PMC7716150)
Supplement: ajcr0010-3973-f7.pdf [file ajcr0010-3973-f7.pdf]

## Clonal expansion of CD8<sup>+</sup> T cells in acute myeloid leukemia patients

**Table S1.** AML Patients and Donors characteristics

| Domain                                       | Patients Total (n = 31) | Donors Total (n = 10) |
|----------------------------------------------|-------------------------|-----------------------|
| Age (y)                                      |                         |                       |
| Median                                       | 47                      | 40                    |
| Range                                        | 23-74                   | 34-46                 |
| Gender                                       |                         |                       |
| Male                                         | 17                      | 5                     |
| Female                                       | 14                      | 5                     |
| WBC ( $\times 10^9/L$ )                      |                         |                       |
| Mean                                         | 27.91                   | 6.17                  |
| Range                                        | 6.38-63.72              | 5.24-7.72             |
| PB blasts (%)                                |                         |                       |
| Mean                                         | 33.29                   |                       |
| Range                                        | 21-56                   |                       |
| PB Absolute blasts count ( $\times 10^9/L$ ) |                         |                       |
| Mean                                         | 9.94                    |                       |
| Range                                        | 1.54-29.94              |                       |
| BM blasts (%)                                |                         |                       |
| Mean                                         | 66.23                   |                       |
| Range                                        | 27-95                   |                       |
| BM Absolute blasts count ( $\times 10^9/L$ ) |                         |                       |
| Mean                                         | 18.76                   |                       |
| Range                                        | 3.08-47.71              |                       |
| Moleculars                                   |                         |                       |
| FLT3-ITD                                     | 16.13%                  |                       |
| NPM1                                         | 19.35%                  |                       |
| TP53                                         | 6.45%                   |                       |
| Cytogenetics                                 |                         |                       |
| Favorable                                    | 22.58%                  |                       |
| Intermediate                                 | 58.07%                  |                       |
| Adverse                                      | 19.35%                  |                       |

WBC, white blood cell; PB, peripheral blood; BM, bone marrow. AML type accords to WHO (World Health Organization) 2016.

## Clonal expansion of CD8<sup>+</sup> T cells in acute myeloid leukemia patients

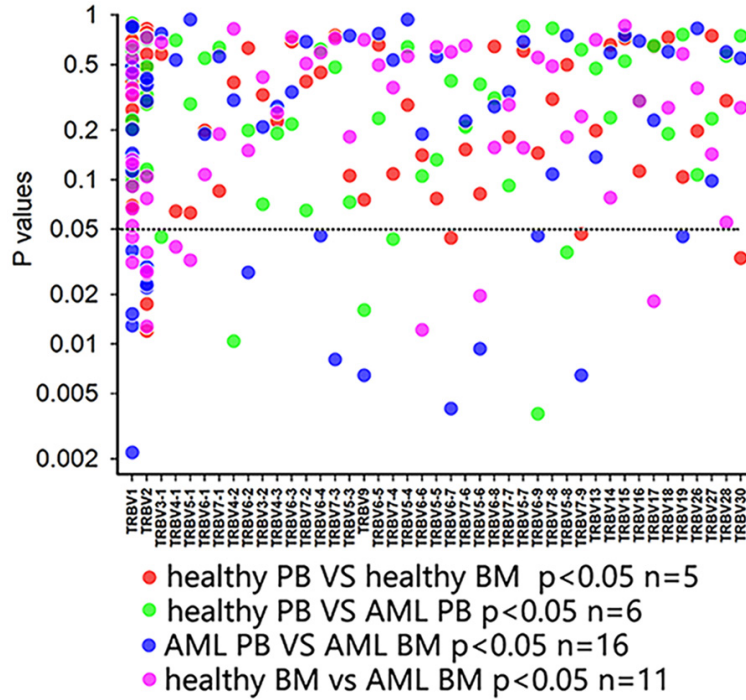

**Figure S1.** Comparison of overall usage of TCR $\beta$  V gene segments in AML patients and healthy donors. Differences in the frequencies of TR $\beta$  V gene segments in normal PB vs. normal BM, AML PB vs. AML BM, AML BM vs. normal BM, and AML PB vs. normal PB. Four study groups containing BM ( $n = 31$ ) and PB ( $n = 31$ ) samples obtained from AML patients and BM ( $n = 10$ ) and PB ( $n = 10$ ) samples obtained from healthy donors.

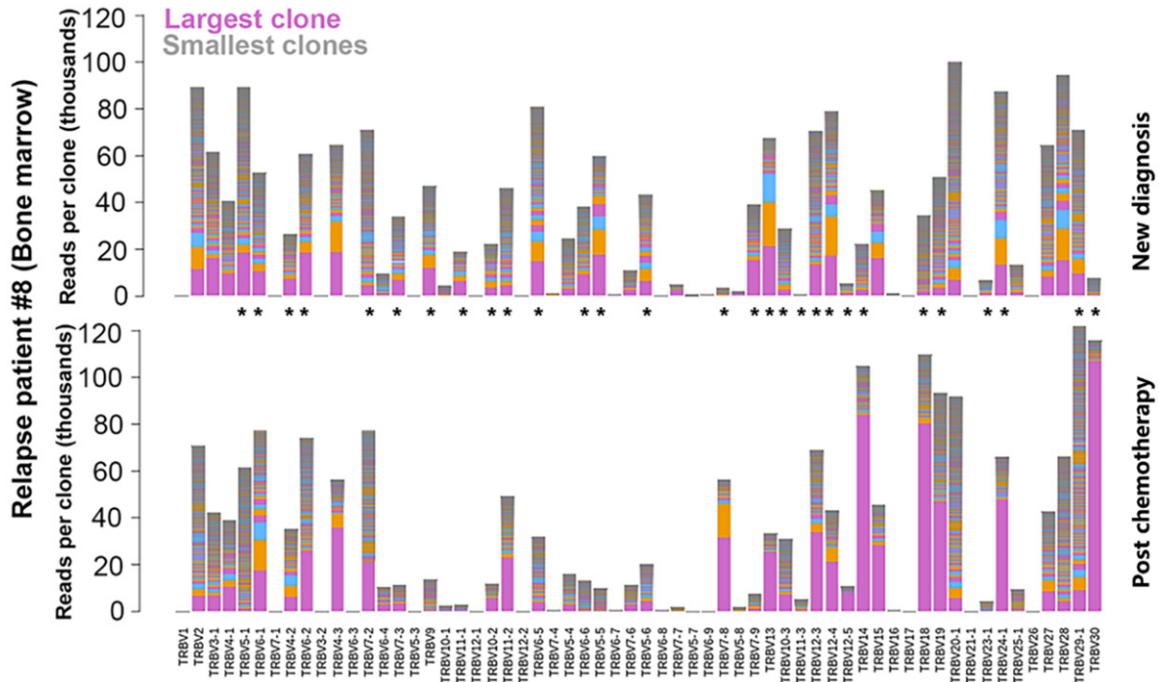

**Figure S2.** The usage pattern of V gene segments in the relapsed patient (#8) at new diagnosis and post chemotherapy. Color segments within each bar indicate the contribution of individual clones, arranged from the smallest clones (gray, top) to the largest clones (purple, bottom). The Mann-Whitney U-test was used for comparisons between two groups. \* indicates  $P < 0.01$ .

## Clonal expansion of CD8<sup>+</sup> T cells in acute myeloid leukemia patients

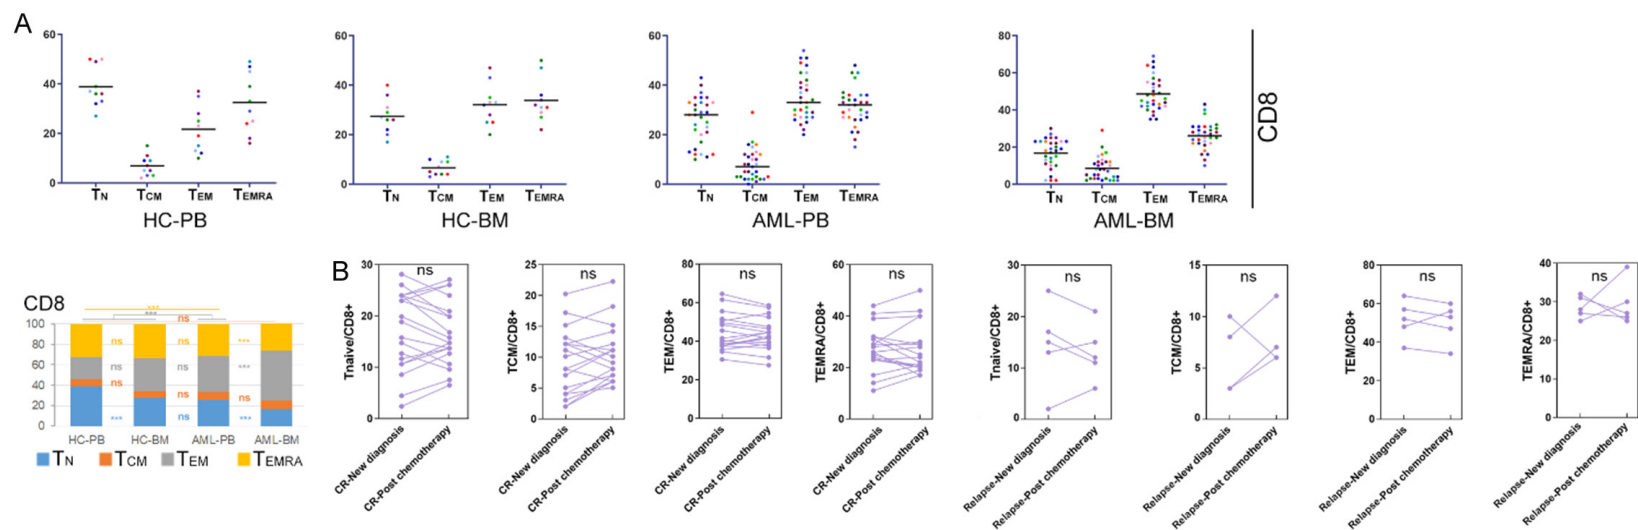

**Figure S3.** Phenotypical analysis of CD8<sup>+</sup> T cells from healthy donors and AML patients. CD8<sup>+</sup> T cell subsets were analyzed by multiparameter flow cytometry according to the expression of CD45RA and CCR7. A. Phenotypical features of BM and PB T cells from newly diagnosed AML patients (n = 31) and healthy controls (HCs) (n = 10). B. Phenotypical features of BM T cells from patients before and after chemotherapy. Samples collected from patients who relapsed (n = 5) and patients who achieved CR (n = 19) after chemotherapy. The Mann-Whitney U-test was used for comparisons between two groups. The Wilcoxon signed-rank test was used for matched paired comparisons. \*\*\* indicates P < 0.01.

## Clonal expansion of CD8<sup>+</sup> T cells in acute myeloid leukemia patients

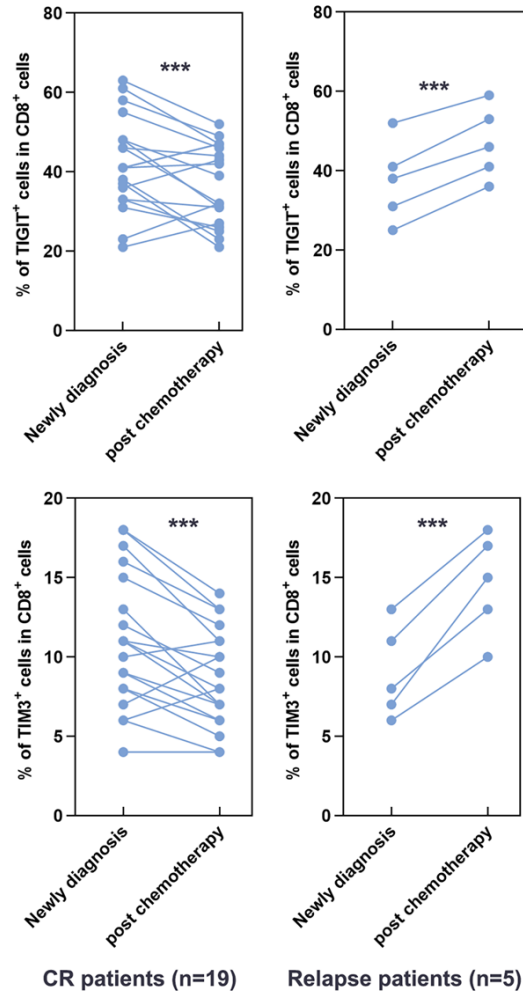

**Figure S4.** Expression levels of TIGIT and TIM3 in BM CD8<sup>+</sup> T cells from patients before and after chemotherapy. Samples collected from patients who relapsed (n = 5) and patients who achieved CR (n = 19) after chemotherapy and analyzed by flow cytometry. The Wilcoxon signed-rank test was used for matched paired comparisons. \*\*\* indicates P < 0.01.

## Clonal expansion of CD8<sup>+</sup> T cells in acute myeloid leukemia patients

**Table S2.** The top 50 clonotypes in CD8<sup>+</sup> T cells were frequently distributed in CD8<sup>+</sup> PD-1<sup>+</sup> populations and CD8<sup>+</sup> PD-1<sup>-</sup> populations

| Variable Gene | Diversity Gene | Joining Gene | Constant | CDR3 AA           | V Gene Allele | D Gene Allele | J Gene Allele | PD-1 <sup>+</sup> Freq. (%) | PD-1 <sup>-</sup> Freq. (%) |
|---------------|----------------|--------------|----------|-------------------|---------------|---------------|---------------|-----------------------------|-----------------------------|
| TRBV6-2       | TRBD2          | TRBJ2-7      | TRBC2    | ASSGLAGANDEQY     | 1             | 2             | 1             | 6.828                       | 0.806                       |
| TRBV24-1      | TRBD2          | TRBJ2-1      | TRBC2    | ATSAQMDYNEQF      | 1             | 1             | 1             | 3.252                       | 0.155                       |
| TRBV6-2       | TRBD2          | TRBJ2-1      | TRBC2    | ASSYKTRRNEQF      | 1             | 2             | 1             | 2.035                       | 0.000                       |
| TRBV7-8       |                | TRBJ2-1      | TRBC2    | ASSPSPSYNEQF      | 1             |               | 1             | 3.181                       | 0.069                       |
| TRBV4-3       | TRBD1          | TRBJ2-3      | TRBC2    | ASSQANQGNTQY      | 1             | 1             | 1             | 2.150                       | 0.086                       |
| TRBV6-2       | TRBD2          | TRBJ2-5      | TRBC2    | ATMGLAGVETQY      | 1             | 2             | 1             | 1.947                       | 0.083                       |
| TRBV4-1       |                | TRBJ1-5      | TRBC1    | ASSQSAVSNQPQH     | 1             |               | 1             | 3.737                       | 0.056                       |
| TRBV19        | TRBD1          | TRBJ1-2      | TRBC1    | ASSFGTSDGYT       | 1             | 1             | 1             | 1.696                       | 0.000                       |
| TRBV29-1      | TRBD2          | TRBJ2-3      | TRBC2    | SVRTTSTDTQY       | 1             | 1             | 1             | 1.794                       | 0.413                       |
| TRBV19        | TRBD1          | TRBJ2-1      | TRBC2    | ASSYSDSNNEQF      | 1             | 1             | 1             | 0.856                       | 0.338                       |
| TRBV11-2      | TRBD1          | TRBJ2-7      | TRBC2    | ASGPPTVFEQY       | 3             | 1             | 1             | 0.787                       | 0.276                       |
| TRBV2         | TRBD1          | TRBJ2-7      | TRBC2    | ASKDRGYEQY        | 1             | 1             | 1             | 0.456                       | 0.200                       |
| TRBV6-2       | TRBD1          | TRBJ1-5      | TRBC1    | ASSYSYGTGGTSGQPQH | 1             | 1             | 1             | 0.450                       | 0.178                       |
| TRBV28        |                | TRBJ2-7      | TRBC2    | ASTAAEQY          | 1             |               | 1             | 0.210                       | 0.000                       |
| TRBV4-3       | TRBD2          | TRBJ2-5      | TRBC2    | ASSQEPPGSKVETQY   | 1             | 2             | 1             | 0.402                       | 0.190                       |
| TRBV5-1       |                | TRBJ2-7      | TRBC2    | ASRLPGGNEQY       | 1             |               | 1             | 0.400                       | 0.011                       |
| TRBV15        | TRBD2          | TRBJ2-3      | TRBC2    | ATSGTSGTPDTQY     | 2             | 2             | 1             | 0.998                       | 0.846                       |
| TRBV12-4      |                | TRBJ1-5      | TRBC1    | ASSLGVSNQPQH      | 1             |               | 1             | 0.880                       | 0.036                       |
| TRBV11-2      | TRBD1          | TRBJ2-3      | TRBC2    | ASSLEGQNTQY       | 1             | 1             | 1             | 0.862                       | 0.261                       |
| TRBV19        |                | TRBJ1-1      | TRBC1    | ASSISQDTEAF       | 1             |               | 1             | 0.761                       | 0.526                       |
| TRBV5-1       | TRBD1          | TRBJ2-3      | TRBC2    | ASSLEQGARTDTQY    | 1             | 1             | 1             | 0.850                       | 0.058                       |
| TRBV18        |                | TRBJ2-3      | TRBC2    | ASSVTDQY          | 1             |               | 1             | 0.399                       | 0.000                       |
| TRBV5-4       | TRBD1          | TRBJ2-3      | TRBC2    | ASSPTGQGARDTQY    | 1             | 1             | 1             | 0.765                       | 0.000                       |
| TRBV5-1       |                | TRBJ1-1      | TRBC1    | ASSLELNTEAF       | 1             |               | 1             | 0.725                       | 0.448                       |
| TRBV12-3      | TRBD1          | TRBJ1-1      | TRBC1    | ASSWTGGRAF        | 1             | 1             | 1             | 0.024                       | 0.000                       |
| TRBV24-1      | TRBD2          | TRBJ2-7      | TRBC2    | ATSDLLYGEQY       | 1             | 2             | 1             | 0.023                       | 0.080                       |
| TRBV20-1      |                | TRBJ2-1      | TRBC2    | SARAPAGDEQF       | 1             |               | 1             | 0.023                       | 0.131                       |
| TRBV18        | TRBD2          | TRBJ2-1      | TRBC2    | ASSLEGPYNEQF      | 1             | 2             | 1             | 0.219                       | 1.247                       |
| TRBV20-1      | TRBD1          | TRBJ1-1      | TRBC1    | SARTGELEAF        | 1             | 1             | 1             | 0.216                       | 1.140                       |
| TRBV20-1      | TRBD1          | TRBJ1-5      | TRBC1    | SAPLGGLDGQPQH     | 1             | 1             | 1             | 0.213                       | 2.109                       |
| TRBV27        | TRBD2          | TRBJ2-1      | TRBC2    | ASIPGTSGSLYNEQF   | 1             | 2             | 1             | 0.208                       | 0.109                       |
| TRBV5-1       | TRBD2          | TRBJ1-1      | TRBC1    | ASSLEAGYTEAF      | 1             | 2             | 1             | 0.203                       | 0.103                       |
| TRBV11-1      | TRBD2          | TRBJ2-1      | TRBC2    | ASSLEAGVYNEQF     | 1             | 2             | 1             | 0.200                       | 0.100                       |
| TRBV29-1      | TRBD2          | TRBJ2-1      | TRBC2    | SVGGISNEQF        | 1             | 1             | 1             | 0.195                       | 0.000                       |
| TRBV5-8       | TRBD2          | TRBJ2-5      | TRBC2    | ASSHPATRYIPETQY   | 1             | 1             | 1             | 0.193                       | 0.094                       |
| TRBV9         | TRBD1          | TRBJ1-5      | TRBC1    | ASSPRTGPFNQPQH    | 1             | 1             | 1             | 0.178                       | 0.092                       |
| TRBV7-6       | TRBD1          | TRBJ2-1      | TRBC2    | ASSRGDEQF         | 1             | 1             | 1             | 0.177                       | 0.086                       |
| TRBV7-2       |                | TRBJ1-2      | TRBC1    | ASSLAMAGYT        | 1             |               | 1             | 0.176                       | 0.000                       |
| TRBV7-6       |                | TRBJ2-5      | TRBC2    | ASSSGETQY         | 1             |               | 1             | 0.175                       | 0.084                       |
| TRBV4-1       |                | TRBJ1-3      | TRBC1    | ASSQAQISGNTIY     | 1             |               | 1             | 0.170                       | 0.083                       |
| TRBV12-3      | TRBD2          | TRBJ2-1      | TRBC2    | ASSSTSGRSEQF      | 1             | 2             | 1             | 0.200                       | 0.313                       |
| TRBV2         | TRBD2          | TRBJ2-1      | TRBC2    | AGGTPVVDQF        | 1             | 1             | 1             | 0.354                       | 0.060                       |
| TRBV20-1      |                | TRBJ1-6      | TRBC1    | SATDHNSPLH        | 1             |               | 1             | 0.451                       | 0.178                       |
| TRBV6-5       | TRBD1          | TRBJ1-1      | TRBC1    | ASSYSRQGVTEAF     | 1             | 1             | 1             | 0.167                       | 0.000                       |
| TRBV3-1       | TRBD2          | TRBJ1-3      | TRBC1    | ASGGRLSGNTIY      | 1             | 1             | 1             | 0.548                       | 0.043                       |
| TRBV7-6       | TRBD1          | TRBJ2-7      | TRBC2    | ASSFRGTALDEQY     | 1             | 1             | 1             | 0.277                       | 0.247                       |
| TRBV7-3       |                | TRBJ2-7      | TRBC2    | ATRLASYEQY        | 1             |               | 1             | 0.125                       | 0.072                       |
| TRBV5-4       |                | TRBJ2-1      | TRBC2    | ASSPGPLYLGEQF     | 1             |               | 1             | 0.125                       | 0.072                       |
| TRBV7-2       |                | TRBJ2-5      | TRBC2    | ASSFDIETQY        | 2             |               | 1             | 0.123                       | 0.071                       |
| TRBV3-1       | TRBD2          | TRBJ2-5      | TRBC2    | ASSQAGGPEPETQY    | 1             | 2             | 1             | 0.120                       | 0.204                       |

Samples were collected at new diagnosis from patient (Patient #8) who relapsed post chemotherapy.

## Clonal expansion of CD8<sup>+</sup> T cells in acute myeloid leukemia patients

**Table S3.** The top 50 clonotypes in CD8<sup>+</sup> T cells were frequently distributed in CD8<sup>+</sup> PD-1<sup>+</sup> populations and CD8<sup>+</sup> PD-1<sup>-</sup> populations

| Variable Gene | Diversity Gene | Joining Gene | Constant | CDR3 AA            | V Gene Allele | D Gene Allele | J Gene Allele | PD-1 <sup>+</sup> Freq. (%) | PD-1 <sup>-</sup> Freq. (%) |
|---------------|----------------|--------------|----------|--------------------|---------------|---------------|---------------|-----------------------------|-----------------------------|
| TRBV10-3      | TRBD1          | TRBJ2-3      | TRBC2    | AIGEVEQGNADTQY     | 2             | 1             | 1             | 15.324                      | 1.253                       |
| TRBV4-1       | TRBD2          | TRBJ2-1      | TRBC2    | ASSQTLRGGVNEQF     | 1             | 2             | 1             | 2.091                       | 0.499                       |
| TRBV29-1      | TRBD1          | TRBJ2-5      | TRBC2    | SVEDDRGRGETQY      | 1             | 1             | 1             | 1.140                       | 1.062                       |
| TRBV29-1      | TRBD1          | TRBJ2-5      | TRBC2    | SVESDRGRGETQY      | 1             | 1             | 1             | 3.927                       | 0.019                       |
| TRBV5-1       |                | TRBJ2-1      | TRBC2    | ASSLDATALNEQF      | 1             |               | 1             | 2.890                       | 0.000                       |
| TRBV13        |                | TRBJ2-7      | TRBC2    | ASSLVGYEQY         | 1             |               | 1             | 1.878                       | 0.036                       |
| TRBV6-1       | TRBD2          | TRBJ1-5      | TRBC1    | ASSGRAVNQPQH       | 1             | 2             | 1             | 4.798                       | 0.030                       |
| TRBV20-1      |                | TRBJ2-5      | TRBC2    | SASGWSGETQY        | 1             |               | 1             | 1.779                       | 0.336                       |
| TRBV15        | TRBD1          | TRBJ2-7      | TRBC2    | ATSLKGTGEQY        | 2             | 1             | 1             | 1.138                       | 0.041                       |
| TRBV28        |                | TRBJ2-7      | TRBC2    | ASSLDGYEQY         | 1             |               | 1             | 0.734                       | 0.111                       |
| TRBV30        | TRBD2          | TRBJ2-7      | TRBC2    | AWSAGEGYEQY        | 1             | 2             | 1             | 0.634                       | 0.106                       |
| TRBV20-1      |                | TRBJ2-1      | TRBC2    | SARAPAGDEQF        | 1             |               | 1             | 0.607                       | 0.105                       |
| TRBV6-5       | TRBD1          | TRBJ1-2      | TRBC1    | ASSYLGQSFHYGYT     | 1             | 1             | 1             | 0.020                       | 0.518                       |
| TRBV2         | TRBD2          | TRBJ2-7      | TRBC2    | ASRRSSPEQY         | 1             | 1             | 1             | 0.567                       | 0.311                       |
| TRBV6-5       | TRBD2          | TRBJ2-1      | TRBC2    | ASSYSPLAGEQF       | 1             | 1             | 1             | 0.421                       | 0.111                       |
| TRBV7-6       | TRBD2          | TRBJ2-1      | TRBC2    | ASSPEGAGNAYNEQF    | 1             | 1             | 1             | 0.019                       | 0.285                       |
| TRBV4-1       |                | TRBJ2-3      | TRBC2    | ASSQESPHDTQY       | 1             |               | 1             | 0.351                       | 0.138                       |
| TRBV6-4       |                | TRBJ1-1      | TRBC1    | ASSESANTEAF        | 1             |               | 1             | 0.811                       | 0.148                       |
| TRBV4-3       | TRBD1          | TRBJ2-3      | TRBC2    | ASSQANQGNTOY       | 1             | 1             | 1             | 0.794                       | 0.000                       |
| TRBV20-1      | TRBD2          | TRBJ2-1      | TRBC2    | SAATSSGYNEQF       | 5             | 1             | 1             | 0.680                       | 0.000                       |
| TRBV7-9       |                | TRBJ1-1      | TRBC1    | ASSLLHGKNTAF       | 1             |               | 1             | 0.969                       | 0.020                       |
| TRBV12-3      | TRBD2          | TRBJ1-2      | TRBC1    | ASSLIAGAGYGYT      | 1             | 2             | 1             | 0.363                       | 0.000                       |
| TRBV7-8       |                | TRBJ2-7      | TRBC2    | ASSLDGPVQY         | 1             |               | 1             | 1.257                       | 0.021                       |
| TRBV20-1      |                | TRBJ2-3      | TRBC2    | SASHGNSDTQY        | 5             |               | 1             | 0.143                       | 0.004                       |
| TRBV6-5       |                | TRBJ1-5      | TRBC1    | ASSLKPPGEGQPQH     | 1             |               | 1             | 0.736                       | 0.011                       |
| TRBV7-8       |                | TRBJ2-2      | TRBC2    | ASSPGELF           | 1             |               | 1             | 0.227                       | 0.008                       |
| TRBV6-1       | TRBD1          | TRBJ1-5      | TRBC1    | ASRDWGYPPQPQH      | 1             | 1             | 1             | 0.223                       | 0.058                       |
| TRBV13        | TRBD2          | TRBJ2-7      | TRBC2    | ASSSHGVSYEQY       | 1             | 1             | 1             | 0.210                       | 0.122                       |
| TRBV4-3       | TRBD1          | TRBJ2-1      | TRBC2    | ASSQDAAGQVYNEQF    | 1             | 1             | 1             | 0.208                       | 3.503                       |
| TRBV6-1       | TRBD2          | TRBJ1-2      | TRBC1    | ASSDPGGRGYGYT      | 1             | 2             | 1             | 0.874                       | 2.831                       |
| TRBV4-1       | TRBD1          | TRBJ2-7      | TRBC2    | ASSQTGGSSLSYEQY    | 1             | 1             | 1             | 0.202                       | 0.623                       |
| TRBV4-1       | TRBD2          | TRBJ2-4      | TRBC2    | ASSQGGRALFAIQY     | 1             | 2             | 1             | 0.020                       | 0.537                       |
| TRBV27        | TRBD2          | TRBJ2-3      | TRBC2    | ASSSRLAGGTDQY      | 1             | 2             | 1             | 0.118                       | 0.528                       |
| TRBV9         | TRBD1          | TRBJ2-1      | TRBC2    | ASSPQGSYNEQF       | 1             | 1             | 1             | 0.185                       | 0.657                       |
| TRBV7-2       |                | TRBJ2-5      | TRBC2    | ASSDQETQY          | 1             |               | 1             | 0.180                       | 0.789                       |
| TRBV28        |                | TRBJ2-7      | TRBC2    | ASTAAEQY           | 1             |               | 1             | 0.172                       | 0.253                       |
| TRBV20-1      |                | TRBJ2-5      | TRBC2    | SARDGKGSETQY       | 5             |               | 1             | 0.172                       | 0.253                       |
| TRBV4-1       |                | TRBJ2-1      | TRBC2    | ASSHGRLTDEQF       | 1             |               | 1             | 0.078                       | 0.384                       |
| TRBV27        |                | TRBJ2-2      | TRBC2    | ASSYGSGELF         | 1             |               | 1             | 0.071                       | 0.314                       |
| TRBV6-2       | TRBD1          | TRBJ1-5      | TRBC1    | ASTLDTYSNQPPQH     | 1             | 1             | 1             | 0.018                       | 0.105                       |
| TRBV20-1      | TRBD1          | TRBJ2-1      | TRBC2    | SAPPRGLGNEQF       | 1             | 1             | 1             | 0.334                       | 0.072                       |
| TRBV20-1      | TRBD2          | TRBJ1-2      | TRBC1    | SVVGGAGGYT         | 5             | 1             | 1             | 0.230                       | 0.024                       |
| TRBV4-1       | TRBD2          | TRBJ2-1      | TRBC2    | ASSWELGEQF         | 1             | 1             | 1             | 0.320                       | 0.037                       |
| TRBV27        | TRBD1          | TRBJ2-1      | TRBC2    | ASSPTPGTVYNEQF     | 1             | 1             | 1             | 0.207                       | 0.017                       |
| TRBV12-4      | TRBD2          | TRBJ2-1      | TRBC2    | ASSFDYFYPSSGSSNEQF | 1             | 2             | 1             | 0.638                       | 0.010                       |
| TRBV10-3      | TRBD2          | TRBJ1-6      | TRBC1    | AIRGGDPPDPLH       | 2             | 1             | 1             | 0.738                       | 0.010                       |
| TRBV29-1      | TRBD2          | TRBJ2-5      | TRBC2    | SASPGLSGETQY       | 1             | 1             | 1             | 0.104                       | 0.099                       |
| TRBV5-1       | TRBD1          | TRBJ2-3      | TRBC2    | ASSLEQGARTDTQY     | 1             | 1             | 1             | 0.102                       | 0.097                       |
| TRBV29-1      | TRBD2          | TRBJ2-1      | TRBC2    | SVVPSGRNNEQF       | 1             | 2             | 1             | 0.099                       | 0.096                       |
| TRBV6-2       |                | TRBJ2-3      | TRBC2    | ASSTSSVDQY         | 1             |               | 1             | 0.099                       | 0.094                       |

Samples were collected after treatment from patient (Patient #8) who relapsed post chemotherapy.

## Clonal expansion of CD8<sup>+</sup> T cells in acute myeloid leukemia patients

**Table S4.** The top 50 clonotypes in CD8<sup>+</sup> T cells were frequently distributed in CD8<sup>+</sup> PD-1<sup>+</sup> populations and CD8<sup>+</sup> PD-1<sup>-</sup> populations

| Variable Gene | Diversity Gene | Joining Gene | Constant | CDR3 AA            | V Gene Allele | D Gene Allele | J Gene Allele | PD-1 <sup>+</sup> Freq. (%) | PD-1 <sup>-</sup> Freq. (%) |
|---------------|----------------|--------------|----------|--------------------|---------------|---------------|---------------|-----------------------------|-----------------------------|
| TRBV6-6       | TRBD1          | TRBJ1-1      | TRBC1    | ASSSSGTGNTAEAF     | 1             | 1             | 1             | 6.013                       | 0.157                       |
| TRBV5-1       | TRBD1          | TRBJ2-7      | TRBC2    | ASSFETEIDEQY       | 1             | 1             | 1             | 3.878                       | 0.120                       |
| TRBV24-1      | TRBD1          | TRBJ2-1      | TRBC2    | ATSEGDYSYNEQF      | 1             | 1             | 1             | 1.684                       | 0.367                       |
| TRBV11-1      | TRBD1          | TRBJ2-7      | TRBC2    | ASSLEGPTYEQY       | 1             | 1             | 1             | 2.667                       | 0.098                       |
| TRBV11-2      | TRBD1          | TRBJ2-5      | TRBC2    | ASSSQVQVETQY       | 1             | 1             | 1             | 2.519                       | 0.029                       |
| TRBV20-1      | TRBD1          | TRBJ1-2      | TRBC1    | SARGLTVADGYT       | 5             | 1             | 1             | 3.390                       | 0.257                       |
| TRBV9         |                | TRBJ1-6      | TRBC1    | ASSGPN SPLH        | 1             |               | 1             | 1.691                       | 1.676                       |
| TRBV9         | TRBD2          | TRBJ1-2      | TRBC1    | ASSGKPGTPHYGYT     | 1             | 2             | 1             | 1.661                       | 0.059                       |
| TRBV7-2       | TRBD2          | TRBJ2-5      | TRBC2    | ASSLGGFQETQY       | 1             | 2             | 1             | 2.638                       | 0.050                       |
| TRBV28        | TRBD1          | TRBJ2-1      | TRBC2    | ASSYRLLSNNEQF      | 1             | 1             | 1             | 0.624                       | 0.049                       |
| TRBV27        |                | TRBJ1-5      | TRBC1    | ASSLDVRSNQPQH      | 1             |               | 1             | 0.589                       | 0.048                       |
| TRBV28        | TRBD2          | TRBJ2-1      | TRBC2    | ASTLTSGSTDEQF      | 1             | 2             | 1             | 0.536                       | 0.042                       |
| TRBV7-2       | TRBD1          | TRBJ2-5      | TRBC2    | ASSLAPGLDEKTQY     | 1             | 1             | 1             | 0.533                       | 0.041                       |
| TRBV14        | TRBD2          | TRBJ2-7      | TRBC2    | ASSLLAENEQY        | 2             | 1             | 1             | 0.474                       | 0.040                       |
| TRBV6-6       |                | TRBJ2-1      | TRBC2    | ASSYIQVGEQF        | 1             |               | 1             | 0.452                       | 0.393                       |
| TRBV20-1      |                | TRBJ2-7      | TRBC2    | SARTTESYEQY        | 5             |               | 1             | 0.020                       | 0.367                       |
| TRBV12-4      |                | TRBJ2-7      | TRBC2    | ASSLNGYVHEQY       | 1             |               | 1             | 0.403                       | 0.035                       |
| TRBV27        | TRBD2          | TRBJ2-1      | TRBC2    | ASSLTPSGNNEQF      | 1             | 2             | 1             | 0.598                       | 0.024                       |
| TRBV9         | TRBD2          | TRBJ2-2      | TRBC2    | ASSGSR LAGGKHAGELF | 1             | 2             | 1             | 0.564                       | 0.260                       |
| TRBV13        |                | TRBJ1-1      | TRBC1    | ASSLADMNTEAF       | 1             |               | 1             | 0.764                       | 0.000                       |
| TRBV10-3      | TRBD2          | TRBJ1-4      | TRBC1    | AISGGPGEKLF        | 3             | 1             | 1             | 0.897                       | 0.000                       |
| TRBV28        | TRBD2          | TRBJ2-3      | TRBC2    | ASSYHWSGAGVTDTOY   | 1             | 2             | 1             | 0.358                       | 0.474                       |
| TRBV4-1       | TRBD2          | TRBJ2-7      | TRBC2    | ASSQEFGLAGGAYEQY   | 1             | 2             | 1             | 0.345                       | 0.049                       |
| TRBV14        | TRBD1          | TRBJ1-5      | TRBC1    | ASSQDRTGPRH        | 2             | 1             | 1             | 0.080                       | 0.000                       |
| TRBV7-2       |                | TRBJ1-5      | TRBC1    | ASSLPETVTRQPQH     | 2             |               | 1             | 0.127                       | 0.036                       |
| TRBV7-6       | TRBD1          | TRBJ1-2      | TRBC1    | ASSMTGLYGYT        | 1             | 1             | 1             | 0.023                       | 0.259                       |
| TRBV12-4      |                | TRBJ2-3      | TRBC2    | ASSLDTQY           | 1             |               | 1             | 0.225                       | 0.248                       |
| TRBV7-2       | TRBD1          | TRBJ1-1      | TRBC1    | ASSLVGNTEAF        | 2             | 1             | 1             | 0.022                       | 0.227                       |
| TRBV4-1       | TRBD1          | TRBJ2-5      | TRBC2    | ASSQSGTSQETQY      | 1             | 1             | 1             | 0.022                       | 0.225                       |
| TRBV6-2       | TRBD2          | TRBJ2-1      | TRBC2    | ASTPPGLAGGRGEQF    | 1             | 2             | 1             | 0.208                       | 0.139                       |
| TRBV18        | TRBD2          | TRBJ2-7      | TRBC2    | ASSPSSGGGREQY      | 1             | 2             | 1             | 0.208                       | 0.138                       |
| TRBV16        | TRBD1          | TRBJ1-2      | TRBC1    | ASSHRTGGFYGYT      | 1             | 1             | 1             | 0.201                       | 0.133                       |
| TRBV20-1      | TRBD1          | TRBJ2-7      | TRBC2    | SARDPGQGSYEQY      | 5             | 1             | 1             | 0.192                       | 0.210                       |
| TRBV5-6       | TRBD1          | TRBJ1-2      | TRBC1    | ASSLTGVHGYT        | 1             | 1             | 1             | 0.185                       | 0.089                       |
| TRBV5-4       |                | TRBJ2-1      | TRBC2    | ASSLESVWSYNEQF     | 1             |               | 1             | 0.174                       | 0.089                       |
| TRBV6-1       | TRBD1          | TRBJ2-2      | TRBC2    | ASQFQGRITGELF      | 1             | 1             | 1             | 0.173                       | 0.172                       |
| TRBV19        |                | TRBJ1-1      | TRBC1    | ASSIRYTEAF         | 1             |               | 1             | 0.172                       | 0.113                       |
| TRBV28        | TRBD1          | TRBJ1-6      | TRBC1    | ASSDSLSTGYN SPLH   | 1             | 1             | 1             | 0.162                       | 0.162                       |
| TRBV9         |                | TRBJ1-6      | TRBC1    | ASSGNS SPLH        | 1             |               | 1             | 0.160                       | 0.101                       |
| TRBV7-2       | TRBD2          | TRBJ2-7      | TRBC2    | ASSPTSGSSYEQY      | 1             | 1             | 1             | 0.157                       | 0.098                       |
| TRBV14        | TRBD2          | TRBJ2-1      | TRBC2    | ASSLTPGSEQF        | 2             | 2             | 1             | 0.855                       | 0.000                       |
| TRBV9         | TRBD2          | TRBJ2-2      | TRBC2    | ASSGPTSGRAHTGELF   | 1             | 2             | 1             | 0.744                       | 0.194                       |
| TRBV30        | TRBD2          | TRBJ2-1      | TRBC2    | AWTLAGDYNEQF       | 1             | 2             | 1             | 0.738                       | 0.050                       |
| TRBV29-1      | TRBD1          | TRBJ2-1      | TRBC2    | SVEQALGDRVNEQF     | 1             | 1             | 1             | 0.590                       | 0.000                       |
| TRBV9         | TRBD2          | TRBJ2-7      | TRBC2    | ASSPPGLGYEQY       | 1             | 1             | 1             | 0.627                       | 0.091                       |
| TRBV29-1      |                | TRBJ2-3      | TRBC2    | SVEFGDTQY          | 1             |               | 1             | 0.942                       | 0.000                       |
| TRBV7-2       |                | TRBJ2-7      | TRBC2    | ASSSGLGTYEQY       | 1             |               | 1             | 0.764                       | 0.142                       |
| TRBV6-1       | TRBD2          | TRBJ2-5      | TRBC2    | ASSQGLDLETQY       | 1             | 1             | 1             | 0.622                       | 0.134                       |
| TRBV20-1      | TRBD2          | TRBJ2-2      | TRBC2    | SASSGREFGELF       | 1             | 2             | 1             | 0.895                       | 0.130                       |
| TRBV20-1      | TRBD2          | TRBJ2-3      | TRBC2    | SASPSRGP SGISDTQY  | 5             | 2             | 1             | 0.418                       | 0.129                       |

Samples were collected at new diagnosis from patient (Patient #19) with sustained CR post chemotherapy.



## Clonal expansion of CD8<sup>+</sup> T cells in acute myeloid leukemia patients

**Table S5.** The top 50 clonotypes in CD8<sup>+</sup> T cells were frequently distributed in CD8<sup>+</sup> PD-1<sup>+</sup> populations and CD8<sup>+</sup> PD-1<sup>-</sup> populations

| Variable Gene | Diversity Gene | Joining Gene | Constant | CDR3 AA            | V Gene Allele | D Gene Allele | J Gene Allele | PD-1 <sup>+</sup> Freq. (%) | PD-1 <sup>-</sup> Freq. (%) |
|---------------|----------------|--------------|----------|--------------------|---------------|---------------|---------------|-----------------------------|-----------------------------|
| TRBV29-1      | TRBD1          | TRBJ2-3      | TRBC2    | SVEWGREGASTDTQY    | 1             | 1             | 1             | 8.169                       | 0.734                       |
| TRBV29-1      | TRBD2          | TRBJ2-1      | TRBC2    | SVPQTLSSGPEHEQF    | 1             | 1             | 1             | 2.272                       | 0.362                       |
| TRBV28        | TRBD1          | TRBJ2-3      | TRBC2    | ASSRDGRTDTQY       | 1             | 1             | 1             | 0.910                       | 0.131                       |
| TRBV5-6       | TRBD1          | TRBJ2-3      | TRBC2    | ASSLAPTGSTDTQY     | 1             | 1             | 1             | 1.742                       | 0.000                       |
| TRBV3-1       | TRBD2          | TRBJ2-1      | TRBC2    | ASSQGRDYPYNEQF     | 1             | 1             | 1             | 1.736                       | 0.172                       |
| TRBV14        | TRBD2          | TRBJ2-7      | TRBC2    | ASSREYEQY          | 1             | 2             | 1             | 1.772                       | 0.000                       |
| TRBV28        | TRBD1          | TRBJ1-1      | TRBC1    | ASSLPGQNTAEF       | 1             | 1             | 1             | 1.419                       | 0.098                       |
| TRBV28        | TRBD1          | TRBJ1-5      | TRBC1    | ASSRQGPQH          | 1             | 1             | 1             | 1.417                       | 0.061                       |
| TRBV7-2       | TRBD2          | TRBJ2-7      | TRBC2    | ASSFSLGLYEQY       | 1             | 1             | 1             | 1.399                       | 0.056                       |
| TRBV2         | TRBD1          | TRBJ2-1      | TRBC2    | ASSRGGAVDEQF       | 1             | 1             | 1             | 0.335                       | 0.050                       |
| TRBV9         | TRBD2          | TRBJ2-5      | TRBC2    | ASSPEETSGQETQY     | 1             | 1             | 1             | 0.589                       | 0.048                       |
| TRBV30        | TRBD2          | TRBJ2-1      | TRBC2    | AWTLAGDYNEQF       | 1             | 2             | 1             | 0.670                       | 0.043                       |
| TRBV9         | TRBD2          | TRBJ2-1      | TRBC2    | ASSVGTFINEQF       | 1             | 1             | 1             | 0.276                       | 0.043                       |
| TRBV29-1      |                | TRBJ2-7      | TRBC2    | SVELYRVGQYVNEQY    | 1             |               | 1             | 0.874                       | 0.043                       |
| TRBV29-1      |                | TRBJ1-1      | TRBC1    | SVAPVNTEAF         | 1             |               | 1             | 0.226                       | 0.042                       |
| TRBV29-1      |                | TRBJ1-1      | TRBC1    | SVETTQNTAEF        | 1             |               | 1             | 0.226                       | 0.000                       |
| TRBV20-1      | TRBD2          | TRBJ2-2      | TRBC2    | SASSGREFGELF       | 1             | 2             | 1             | 0.207                       | 0.038                       |
| TRBV23-1      | TRBD1          | TRBJ2-5      | TRBC2    | ASSARGLTQETQY      | 1             | 1             | 1             | 0.896                       | 0.031                       |
| TRBV4-3       | TRBD2          | TRBJ2-5      | TRBC2    | ASSYGTAGAQY        | 1             | 1             | 1             | 0.695                       | 0.030                       |
| TRBV29-1      |                | TRBJ2-1      | TRBC2    | SVEEPRSNEQF        | 1             |               | 1             | 0.781                       | 0.030                       |
| TRBV29-1      | TRBD1          | TRBJ2-5      | TRBC2    | SVGGHKETQY         | 1             | 1             | 1             | 0.679                       | 0.000                       |
| TRBV6-2       |                | TRBJ2-5      | TRBC2    | ASSSSQETQY         | 1             |               | 1             | 0.578                       | 0.029                       |
| TRBV7-2       | TRBD2          | TRBJ2-5      | TRBC2    | ASSSLGGFQETQY      | 1             | 2             | 1             | 0.876                       | 0.029                       |
| TRBV5-6       |                | TRBJ2-7      | TRBC2    | ASSLDRSIEQY        | 1             |               | 1             | 0.466                       | 0.018                       |
| TRBV6-2       | TRBD2          | TRBJ2-5      | TRBC2    | ASSYPGIRDSIVLQETQY | 1             | 2             | 1             | 0.963                       | 0.000                       |
| TRBV14        | TRBD1          | TRBJ1-2      | TRBC1    | ASRGLTDGYT         | 1             | 1             | 1             | 0.137                       | 0.017                       |
| TRBV29-1      | TRBD2          | TRBJ2-3      | TRBC2    | SVEDEVAGVFSTDTQY   | 1             | 1             | 1             | 0.137                       | 0.016                       |
| TRBV12-4      |                | TRBJ2-7      | TRBC2    | ASSLNGYVHEQY       | 1             |               | 1             | 0.135                       | 0.000                       |
| TRBV7-6       | TRBD2          | TRBJ2-3      | TRBC2    | ASTPNQRGVTDQY      | 1             | 1             | 1             | 0.108                       | 1.160                       |
| TRBV11-3      | TRBD2          | TRBJ2-1      | TRBC2    | ASSLLAGDNEQF       | 1             | 1             | 1             | 0.107                       | 1.154                       |
| TRBV5-4       | TRBD1          | TRBJ1-2      | TRBC1    | ASSLLGDDGYT        | 1             | 1             | 1             | 0.020                       | 0.878                       |
| TRBV14        |                | TRBJ2-1      | TRBC2    | ASSLTHNEQF         | 1             |               | 1             | 0.073                       | 0.605                       |
| TRBV29-1      |                | TRBJ2-3      | TRBC2    | SVGGKLLTDTQY       | 1             |               | 1             | 0.064                       | 0.417                       |
| TRBV14        | TRBD1          | TRBJ1-2      | TRBC1    | ASSQGPQEGFNQYGT    | 1             | 1             | 1             | 0.089                       | 0.482                       |
| TRBV14        |                | TRBJ2-2      | TRBC2    | ASSPIVFDGELF       | 2             |               | 1             | 0.087                       | 0.206                       |
| TRBV29-1      | TRBD2          | TRBJ2-7      | TRBC2    | SVGLADAYEQY        | 1             | 1             | 1             | 0.041                       | 0.197                       |
| TRBV29-1      | TRBD1          | TRBJ2-3      | TRBC2    | SVSSLQKQGTQY       | 1             | 1             | 1             | 0.031                       | 0.190                       |
| TRBV29-1      | TRBD2          | TRBJ2-3      | TRBC2    | SVRLAGGPGTQY       | 1             | 2             | 1             | 0.020                       | 0.168                       |
| TRBV7-2       | TRBD2          | TRBJ2-2      | TRBC2    | ASSLLPQLAGGSPDGELF | 1             | 2             | 1             | 0.083                       | 0.165                       |
| TRBV29-1      | TRBD1          | TRBJ1-4      | TRBC1    | SAAGHLNEKLF        | 1             | 1             | 1             | 0.028                       | 0.165                       |
| TRBV28        | TRBD1          | TRBJ1-1      | TRBC1    | ASSFQGTEAF         | 1             | 1             | 1             | 0.973                       | 0.000                       |
| TRBV18        | TRBD2          | TRBJ2-7      | TRBC2    | ASSPPSSGGGREQY     | 1             | 2             | 1             | 0.771                       | 0.159                       |
| TRBV2         | TRBD1          | TRBJ1-1      | TRBC1    | ARGDRDTEAF         | 1             | 1             | 1             | 0.978                       | 0.156                       |
| TRBV23-1      | TRBD2          | TRBJ2-7      | TRBC2    | ASSQPRGGQRYEQY     | 1             | 2             | 1             | 0.477                       | 0.000                       |
| TRBV23-1      | TRBD2          | TRBJ2-1      | TRBC2    | ASSHLTSGGSYNEQF    | 1             | 1             | 1             | 0.477                       | 0.000                       |
| TRBV28        | TRBD2          | TRBJ2-7      | TRBC2    | ASTIKGSTPYEQY      | 1             | 2             | 1             | 0.367                       | 0.148                       |
| TRBV28        | TRBD2          | TRBJ2-3      | TRBC2    | ASSYHWSGAGVTDQY    | 1             | 2             | 1             | 0.199                       | 0.147                       |
| TRBV14        | TRBD2          | TRBJ2-1      | TRBC2    | ASSRLAGGPIDEQF     | 1             | 1             | 1             | 0.074                       | 0.145                       |
| TRBV7-9       | TRBD2          | TRBJ2-4      | TRBC2    | ASSPLMTGGNIQY      | 1             | 2             | 1             | 0.164                       | 0.136                       |
| TRBV7-2       | TRBD2          | TRBJ2-2      | TRBC2    | ASSLDNSVRTGELF     | 1             | 1             | 1             | 0.255                       | 0.129                       |

Samples were collected after treatment from patient (Patient #19) with sustained CR post chemotherapy.



Clonal expansion of CD8<sup>+</sup> T cells in acute myeloid leukemia patients

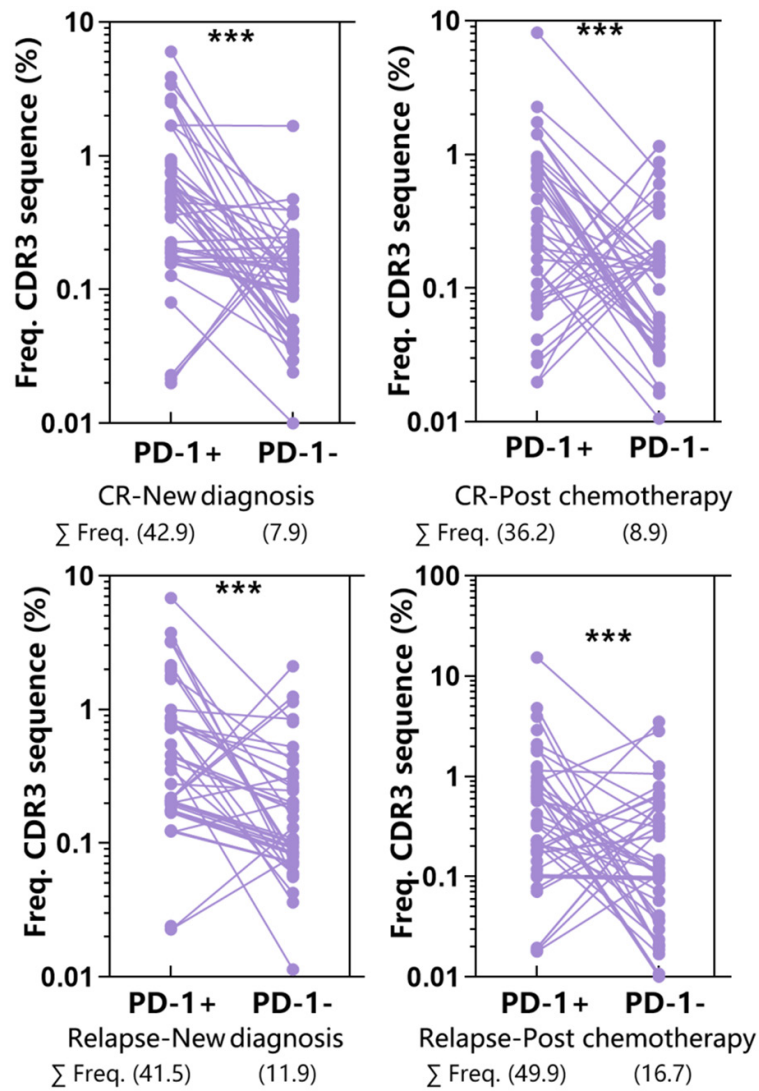

**Figure S5.** The top 50 clonotypes in CD8<sup>+</sup> PD-1<sup>+</sup> T cells were frequently distributed in CD8<sup>+</sup> PD-1<sup>-</sup> populations. A dot is used to represent one patient or one donor sample. CR: patients who were newly diagnosed with AML and remained in complete remission after chemotherapy. Relapse: patients who were newly diagnosed with AML and relapsed post chemotherapy. The Wilcoxon signed-rank test was used for matched paired comparisons. \*\*\* indicates P < 0.01.
